# Supplementary material for: Pathogen clonal expansion underlies multiorgan dissemination and organ-specific outcomes during murine systemic infection
Source: eLife journal article supplement (doi:10.7554/elife.70910), 2021-10-11
Supplement: supp [file elife-70910-supp-v1.zip]

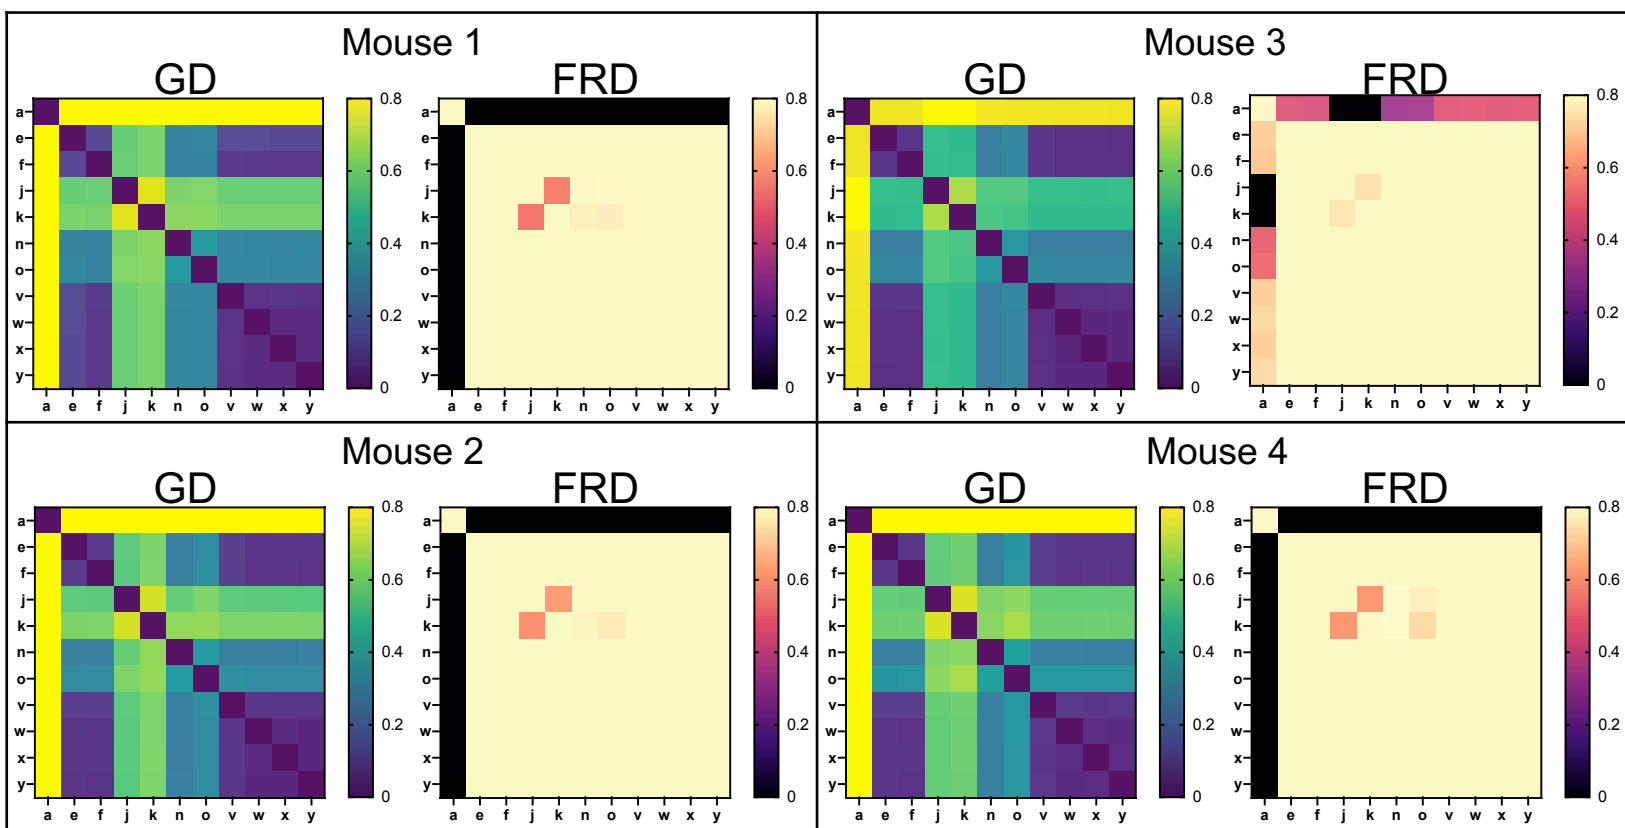

## Codes

- a - Blood (cardiac puncture)
- b - Bile (aspirated from gallbladder)
- e - Spleen (right half)
- f - Spleen (left half)
- j - Kidney (right)
- k - Kidney (left)
- n - Lung (right)
- o - Lung (left)
- v - Liver (caudate lobe)
- w - Liver (right lobe)
- x - Liver (left lobe)
- y - Liver (medial lobe)
