# Supplementary figures and images for: Pathogen clonal expansion underlies multiorgan dissemination and organ-specific outcomes during murine systemic infection
Source: eLife journal article supplement (doi:10.7554/elife.70910), 2021-10-11

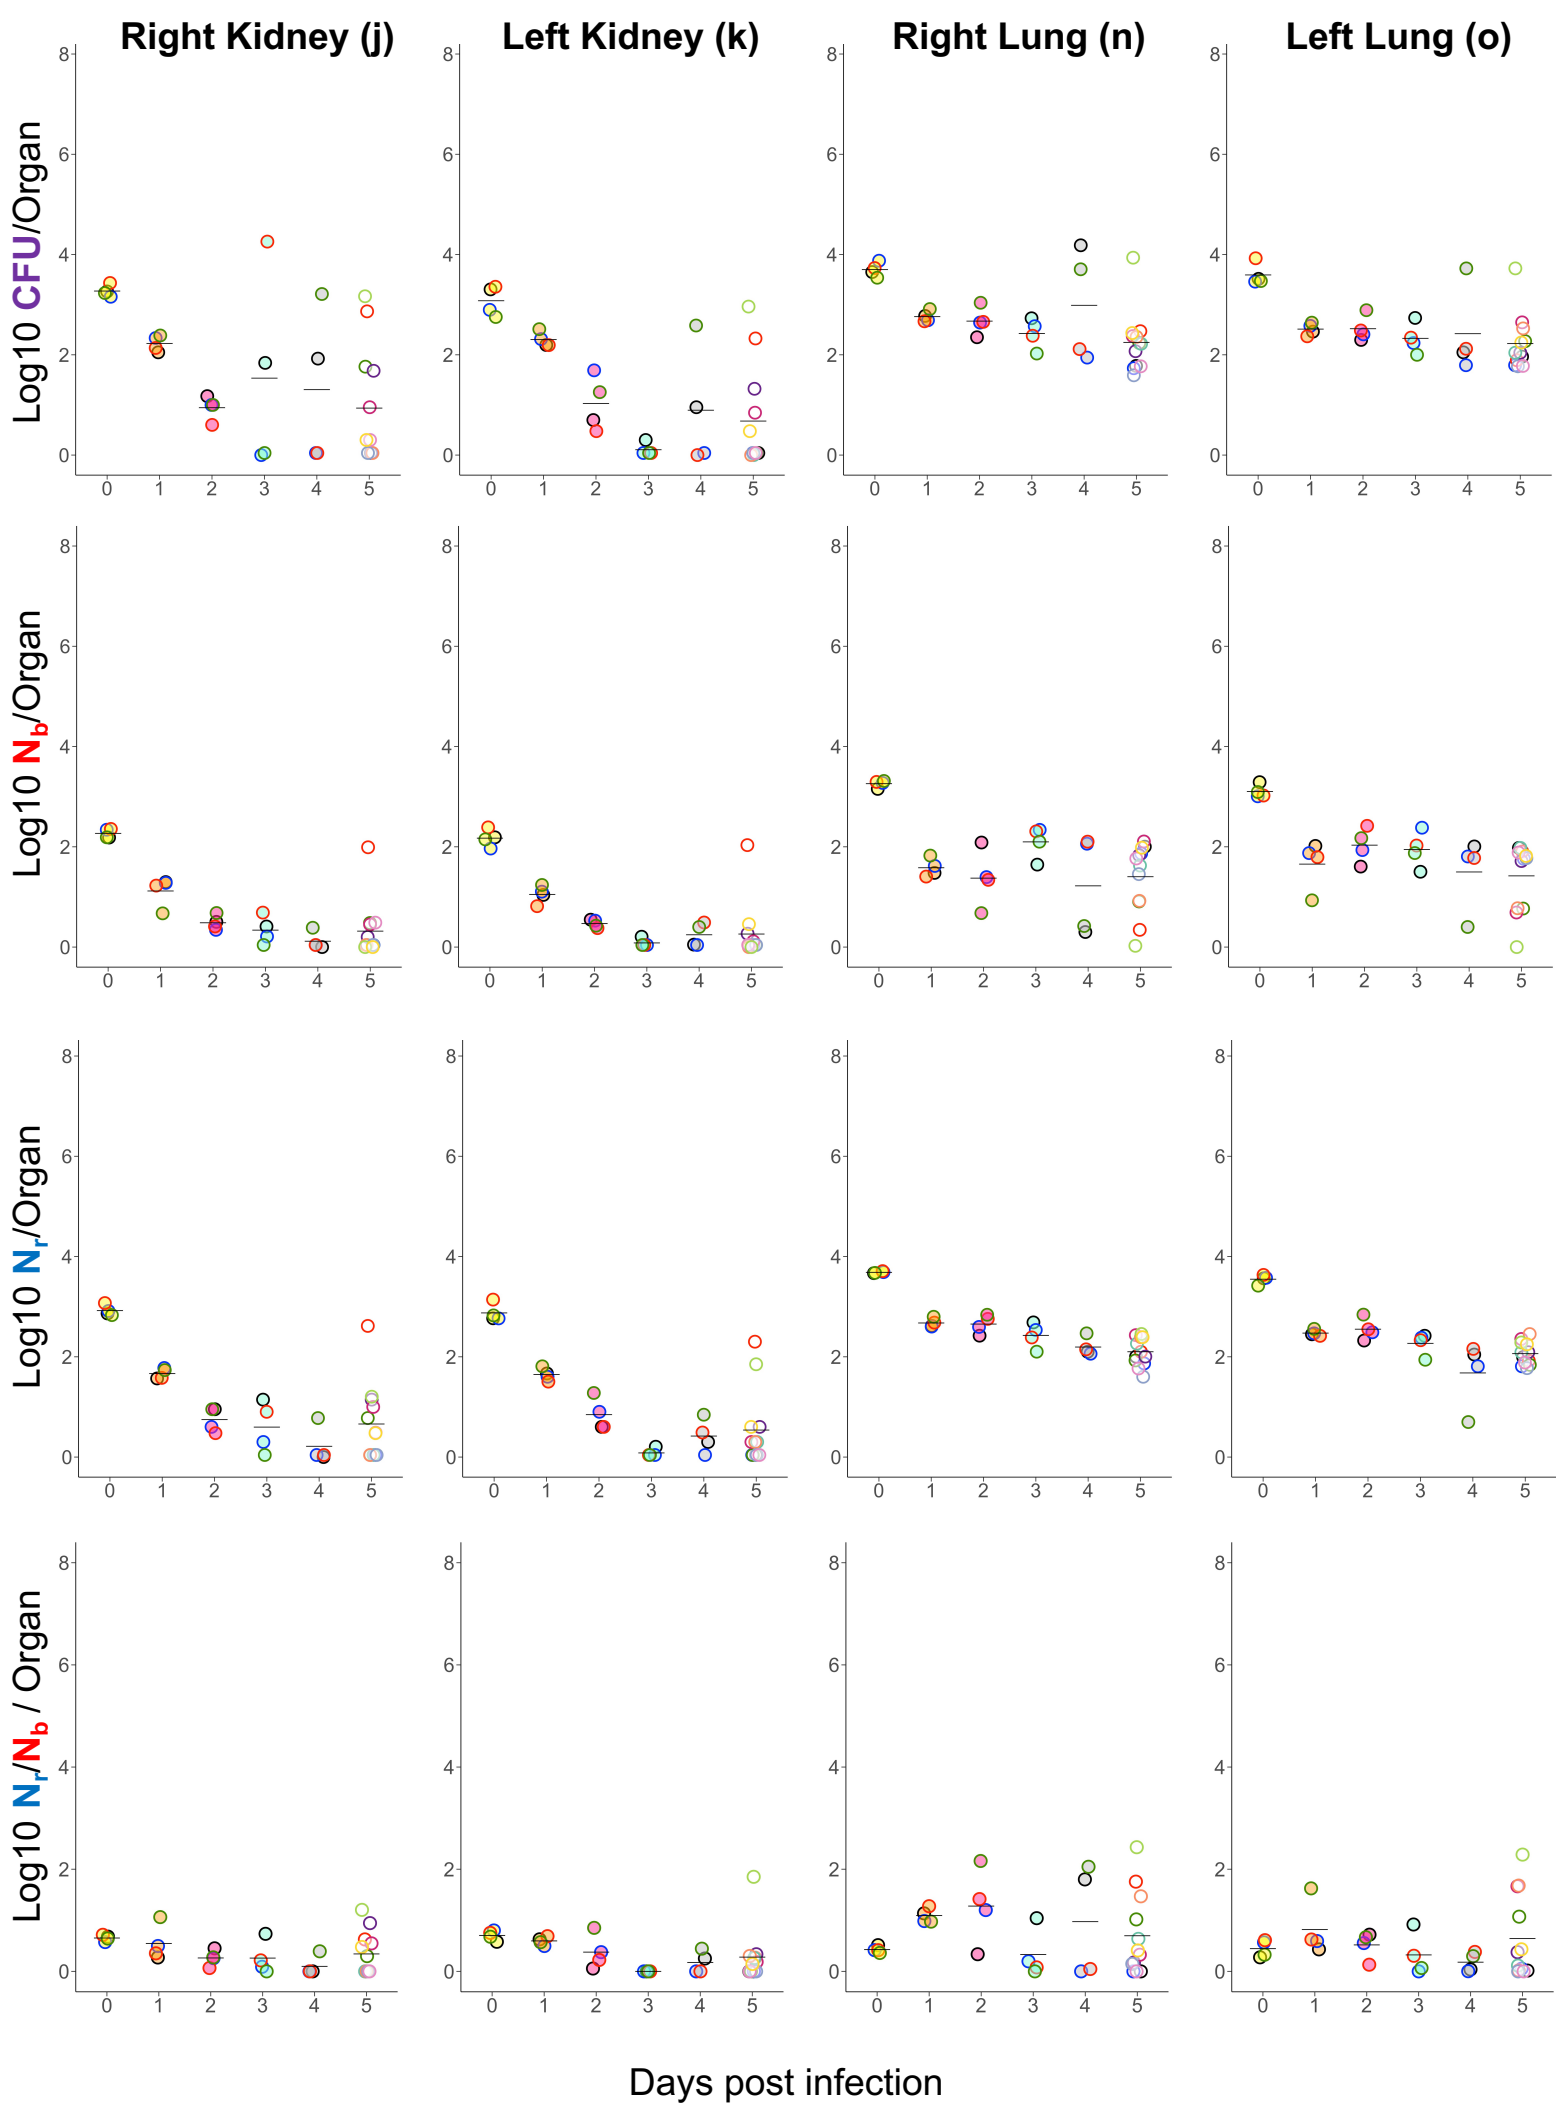

Supplement: supp [file elife-70910-supp-v1.zip]

**A**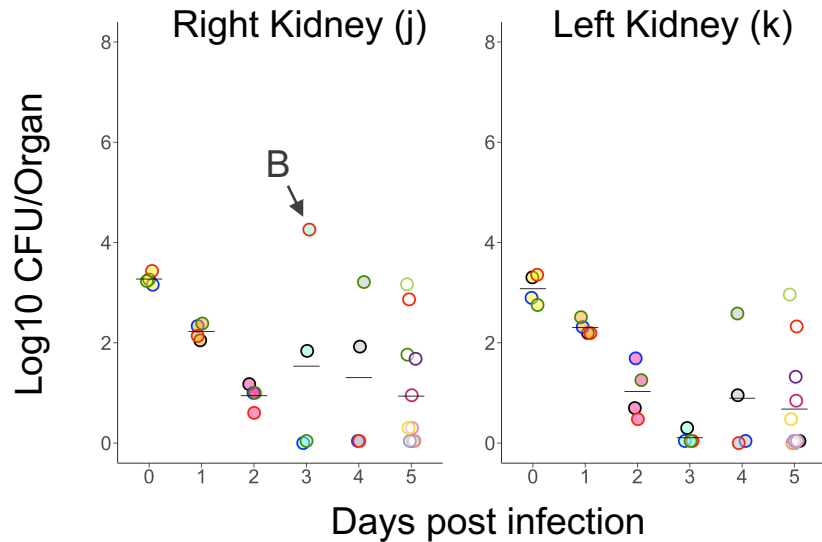**B**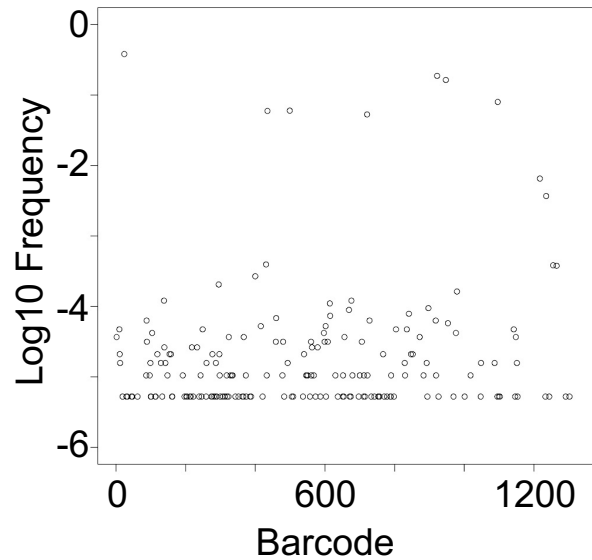

Supplement: supp [file elife-70910-supp-v1.zip]

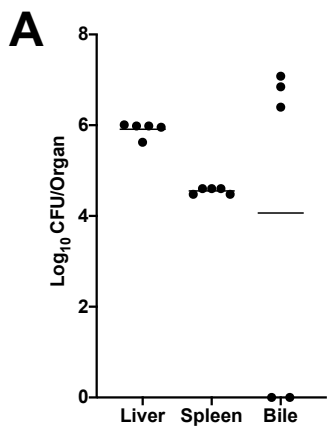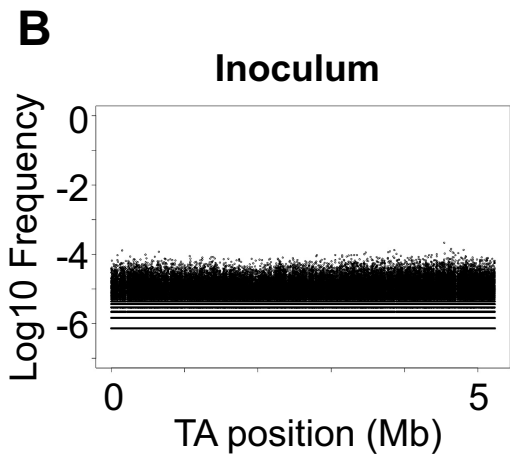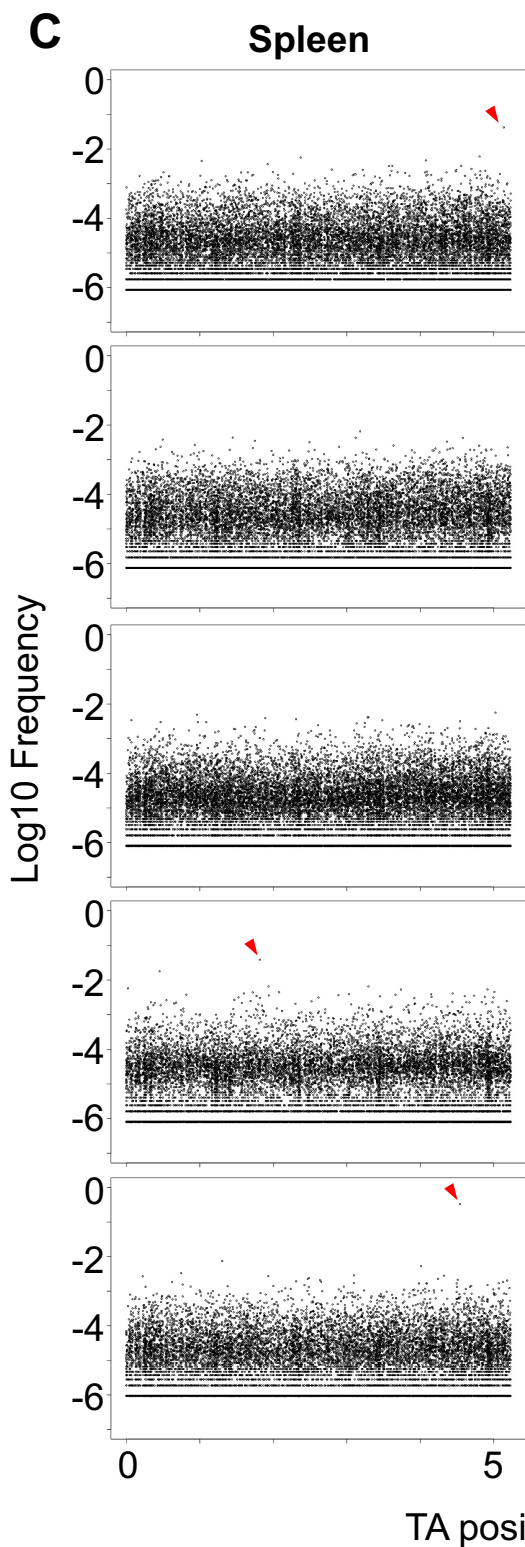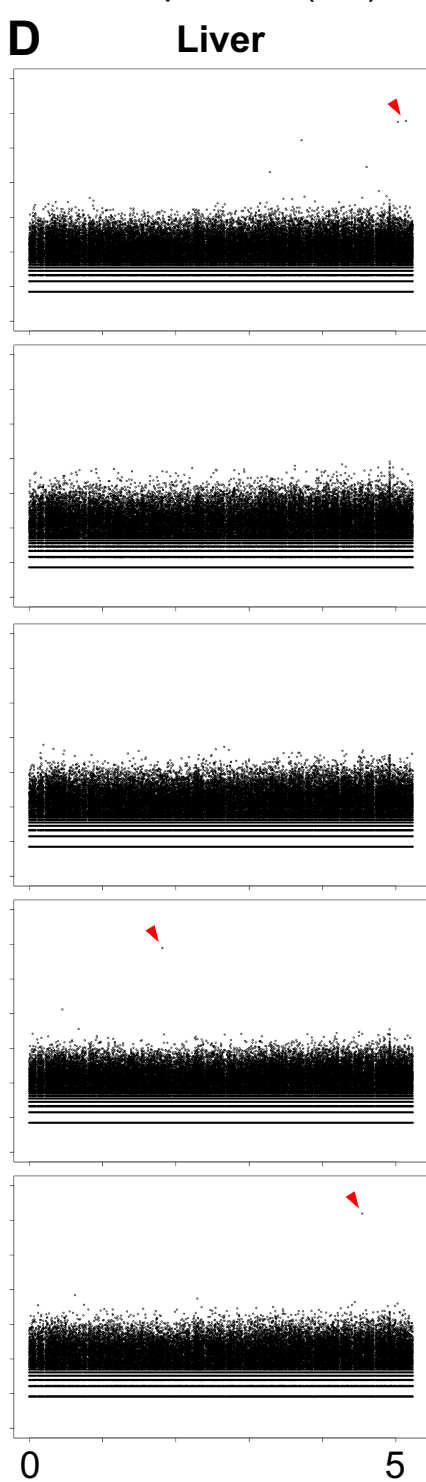

Supplement: supp [file elife-70910-supp-v1.zip]

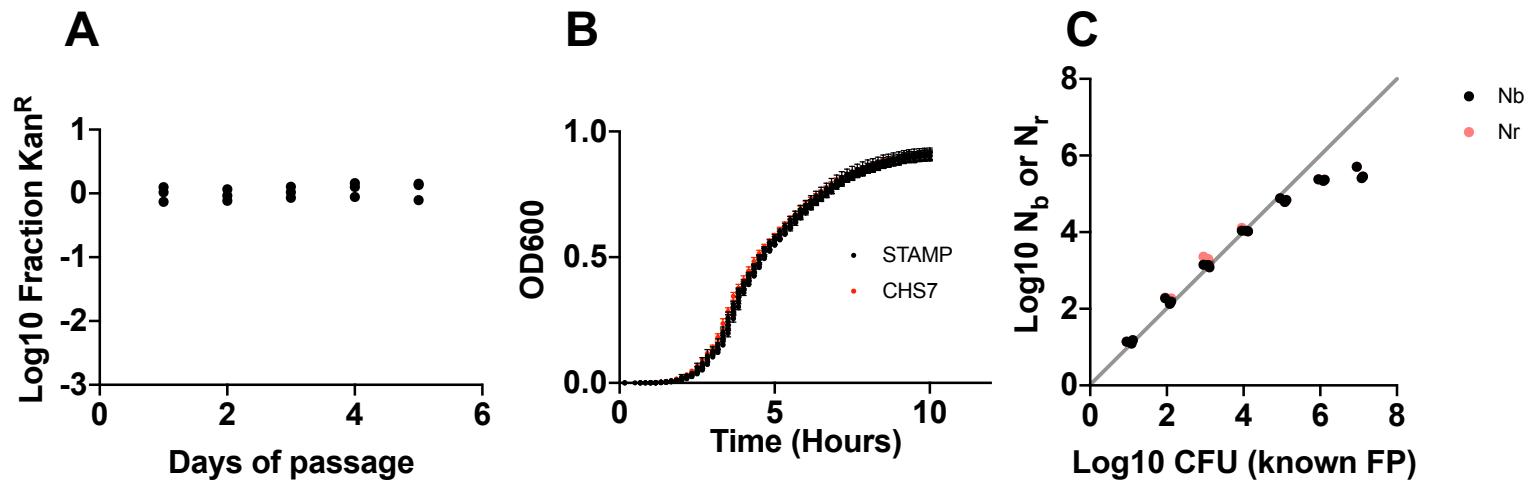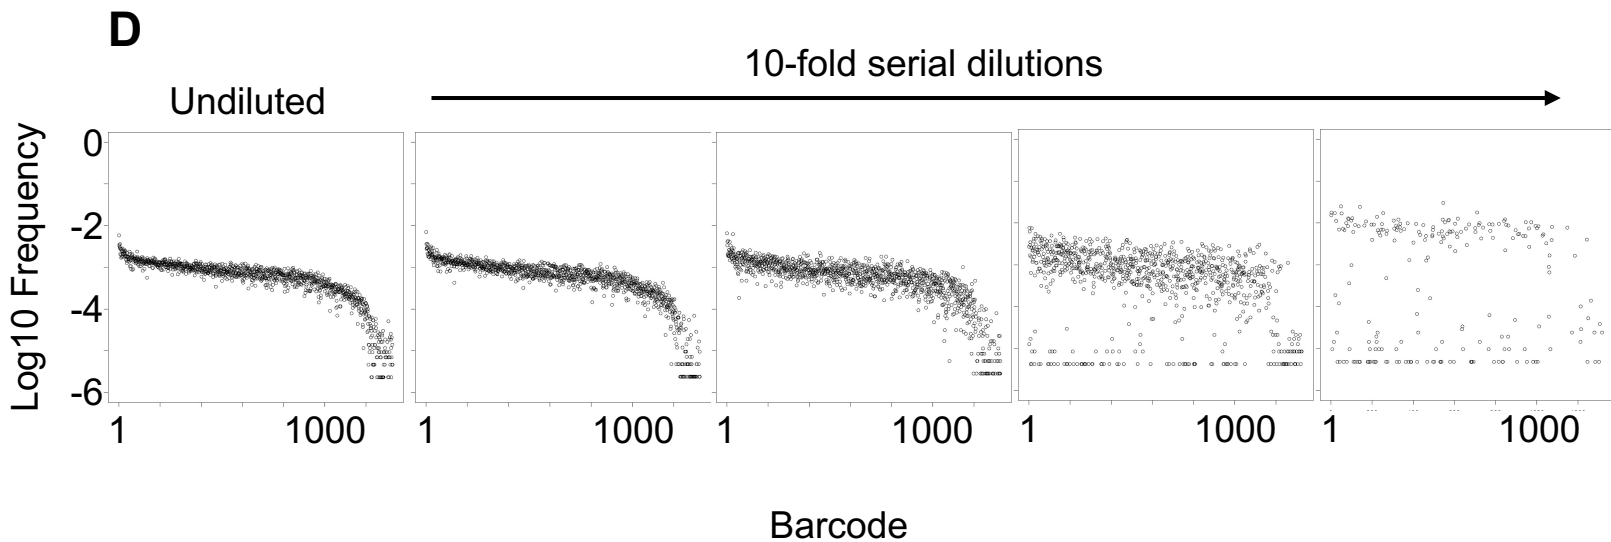

Supplement: supp [file elife-70910-supp-v1.zip]

Mouse 21

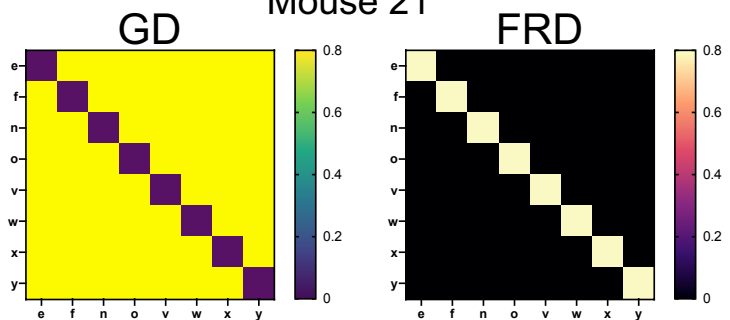

Mouse 33

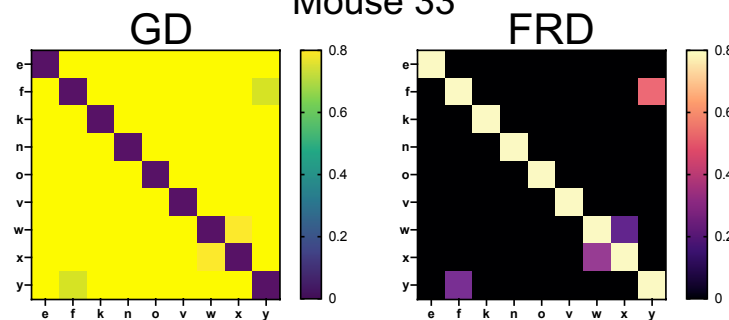

Mouse 22

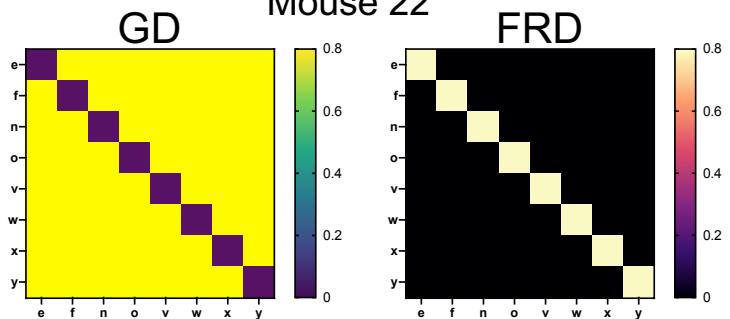

Mouse 34

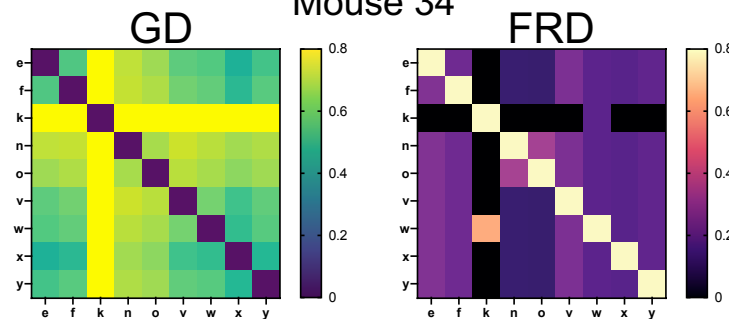

Mouse 23

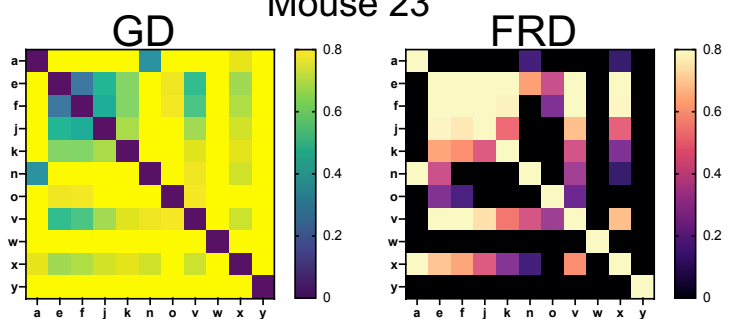

Mouse 51

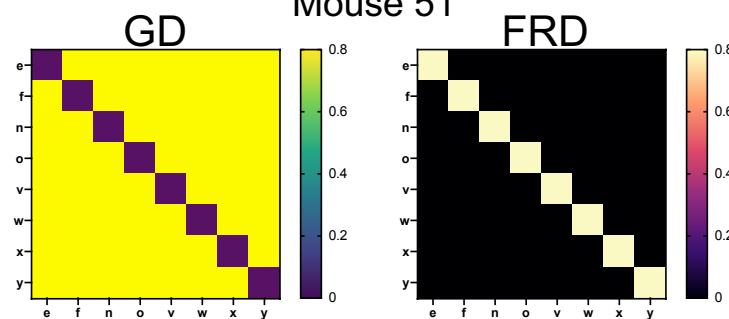

Mouse 24

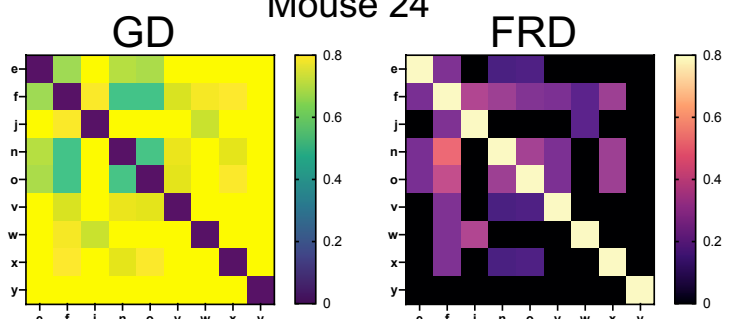

Mouse 52

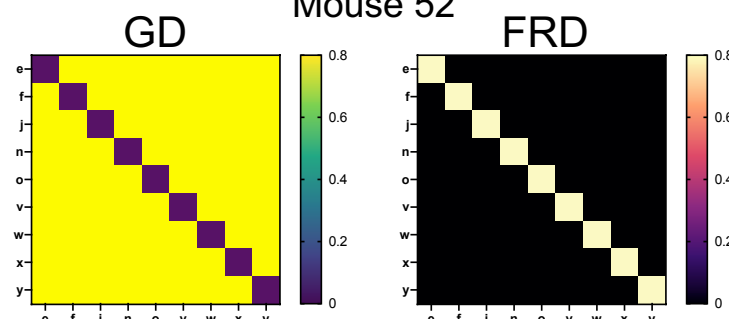

Mouse 31

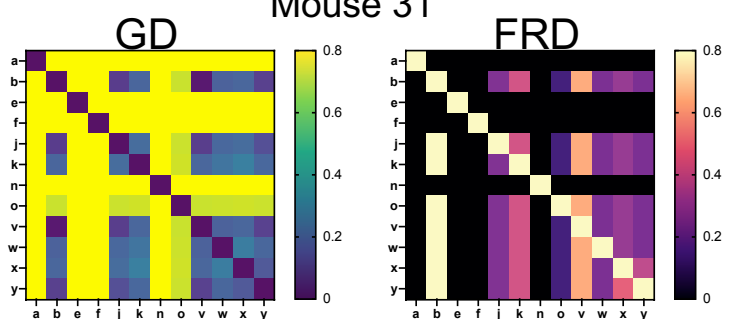

Mouse 53

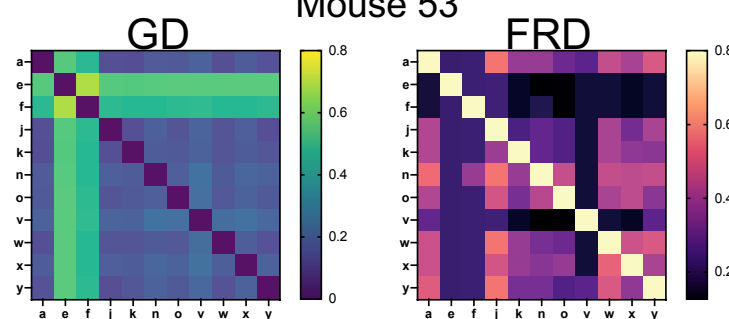

Mouse 32

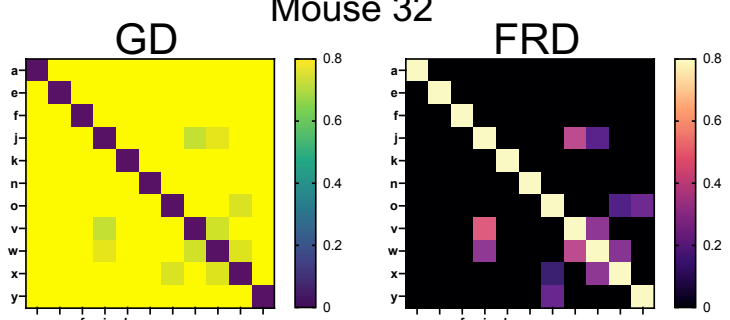

Mouse 54

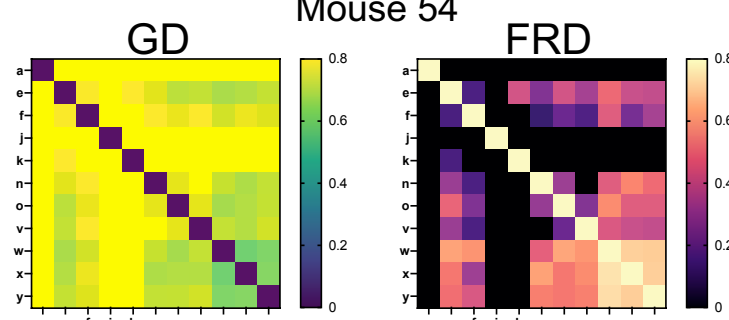

Supplement: supp [file elife-70910-supp-v1.zip]

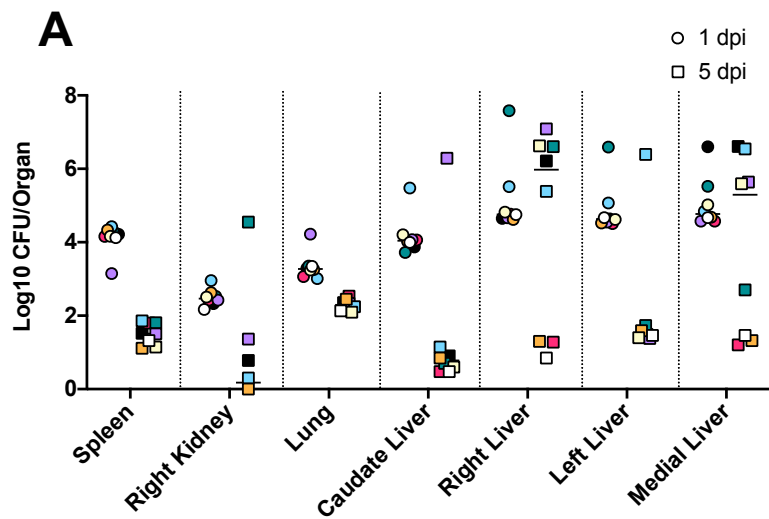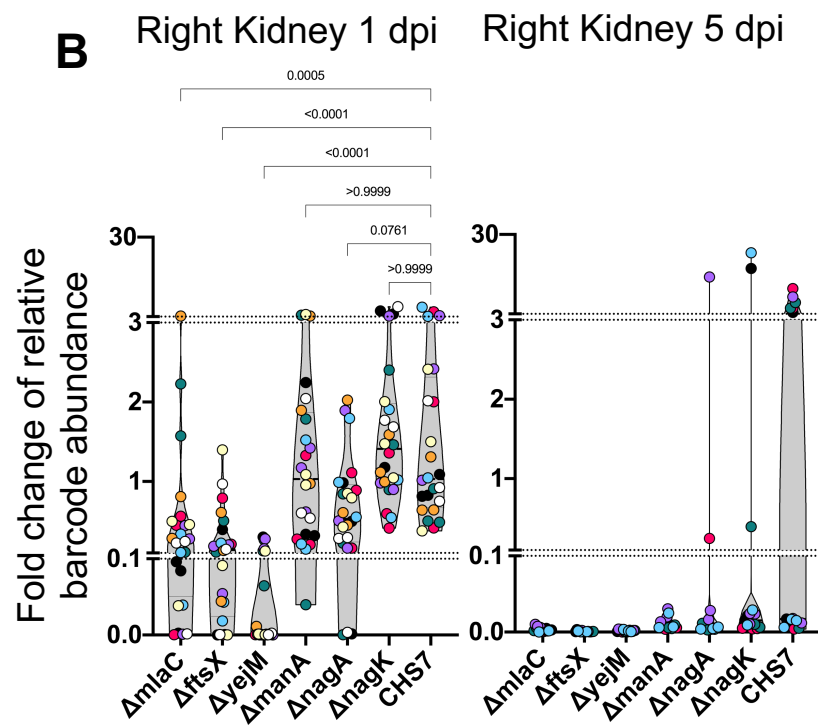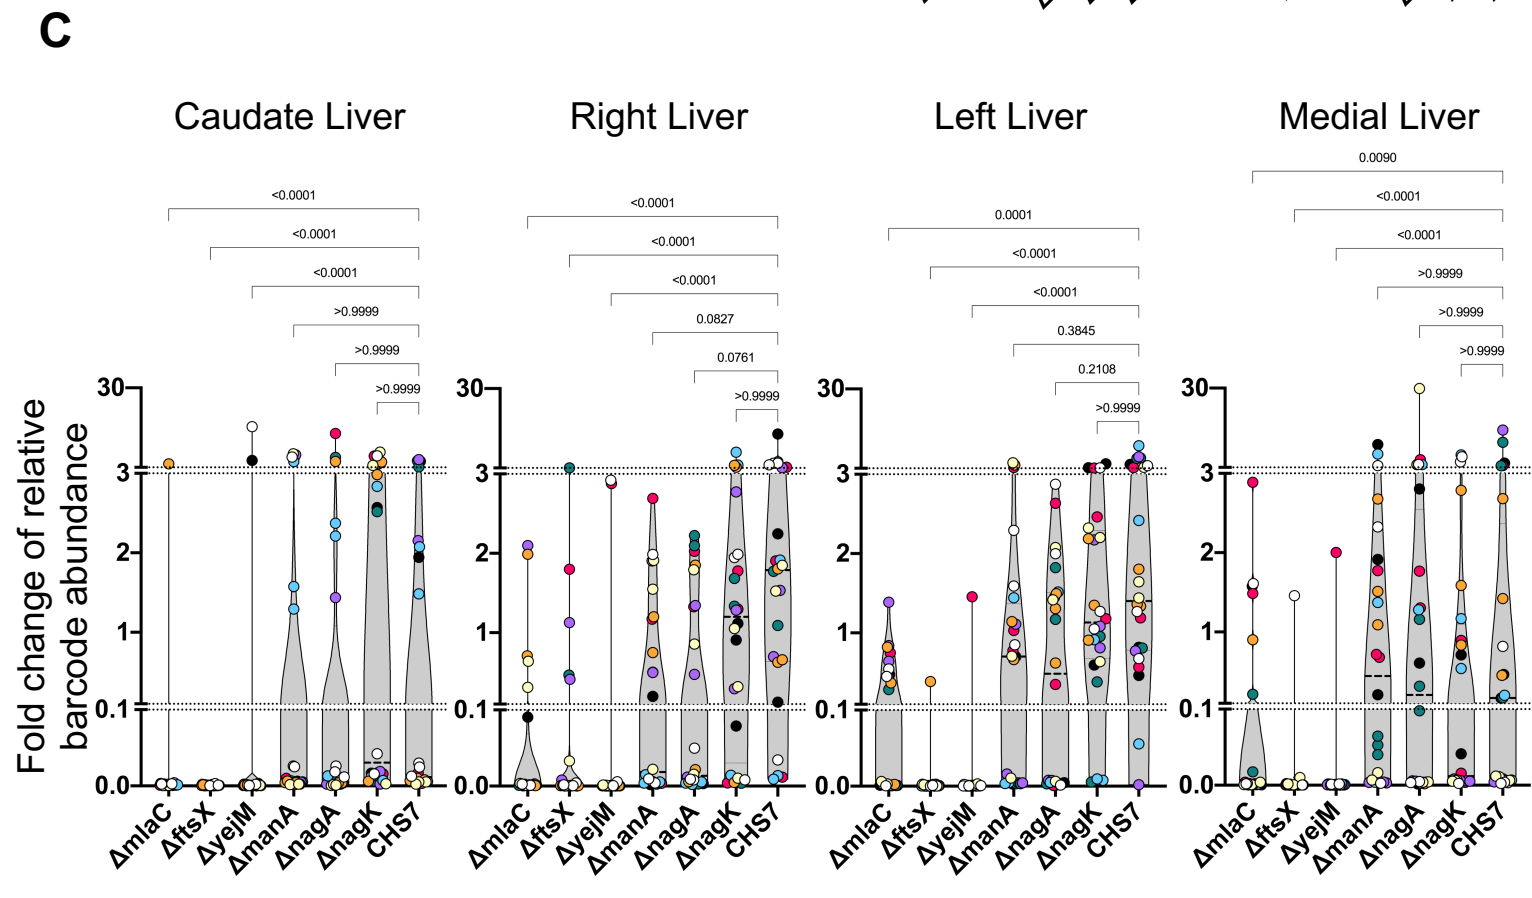

Supplement: supp [file elife-70910-supp-v1.zip]

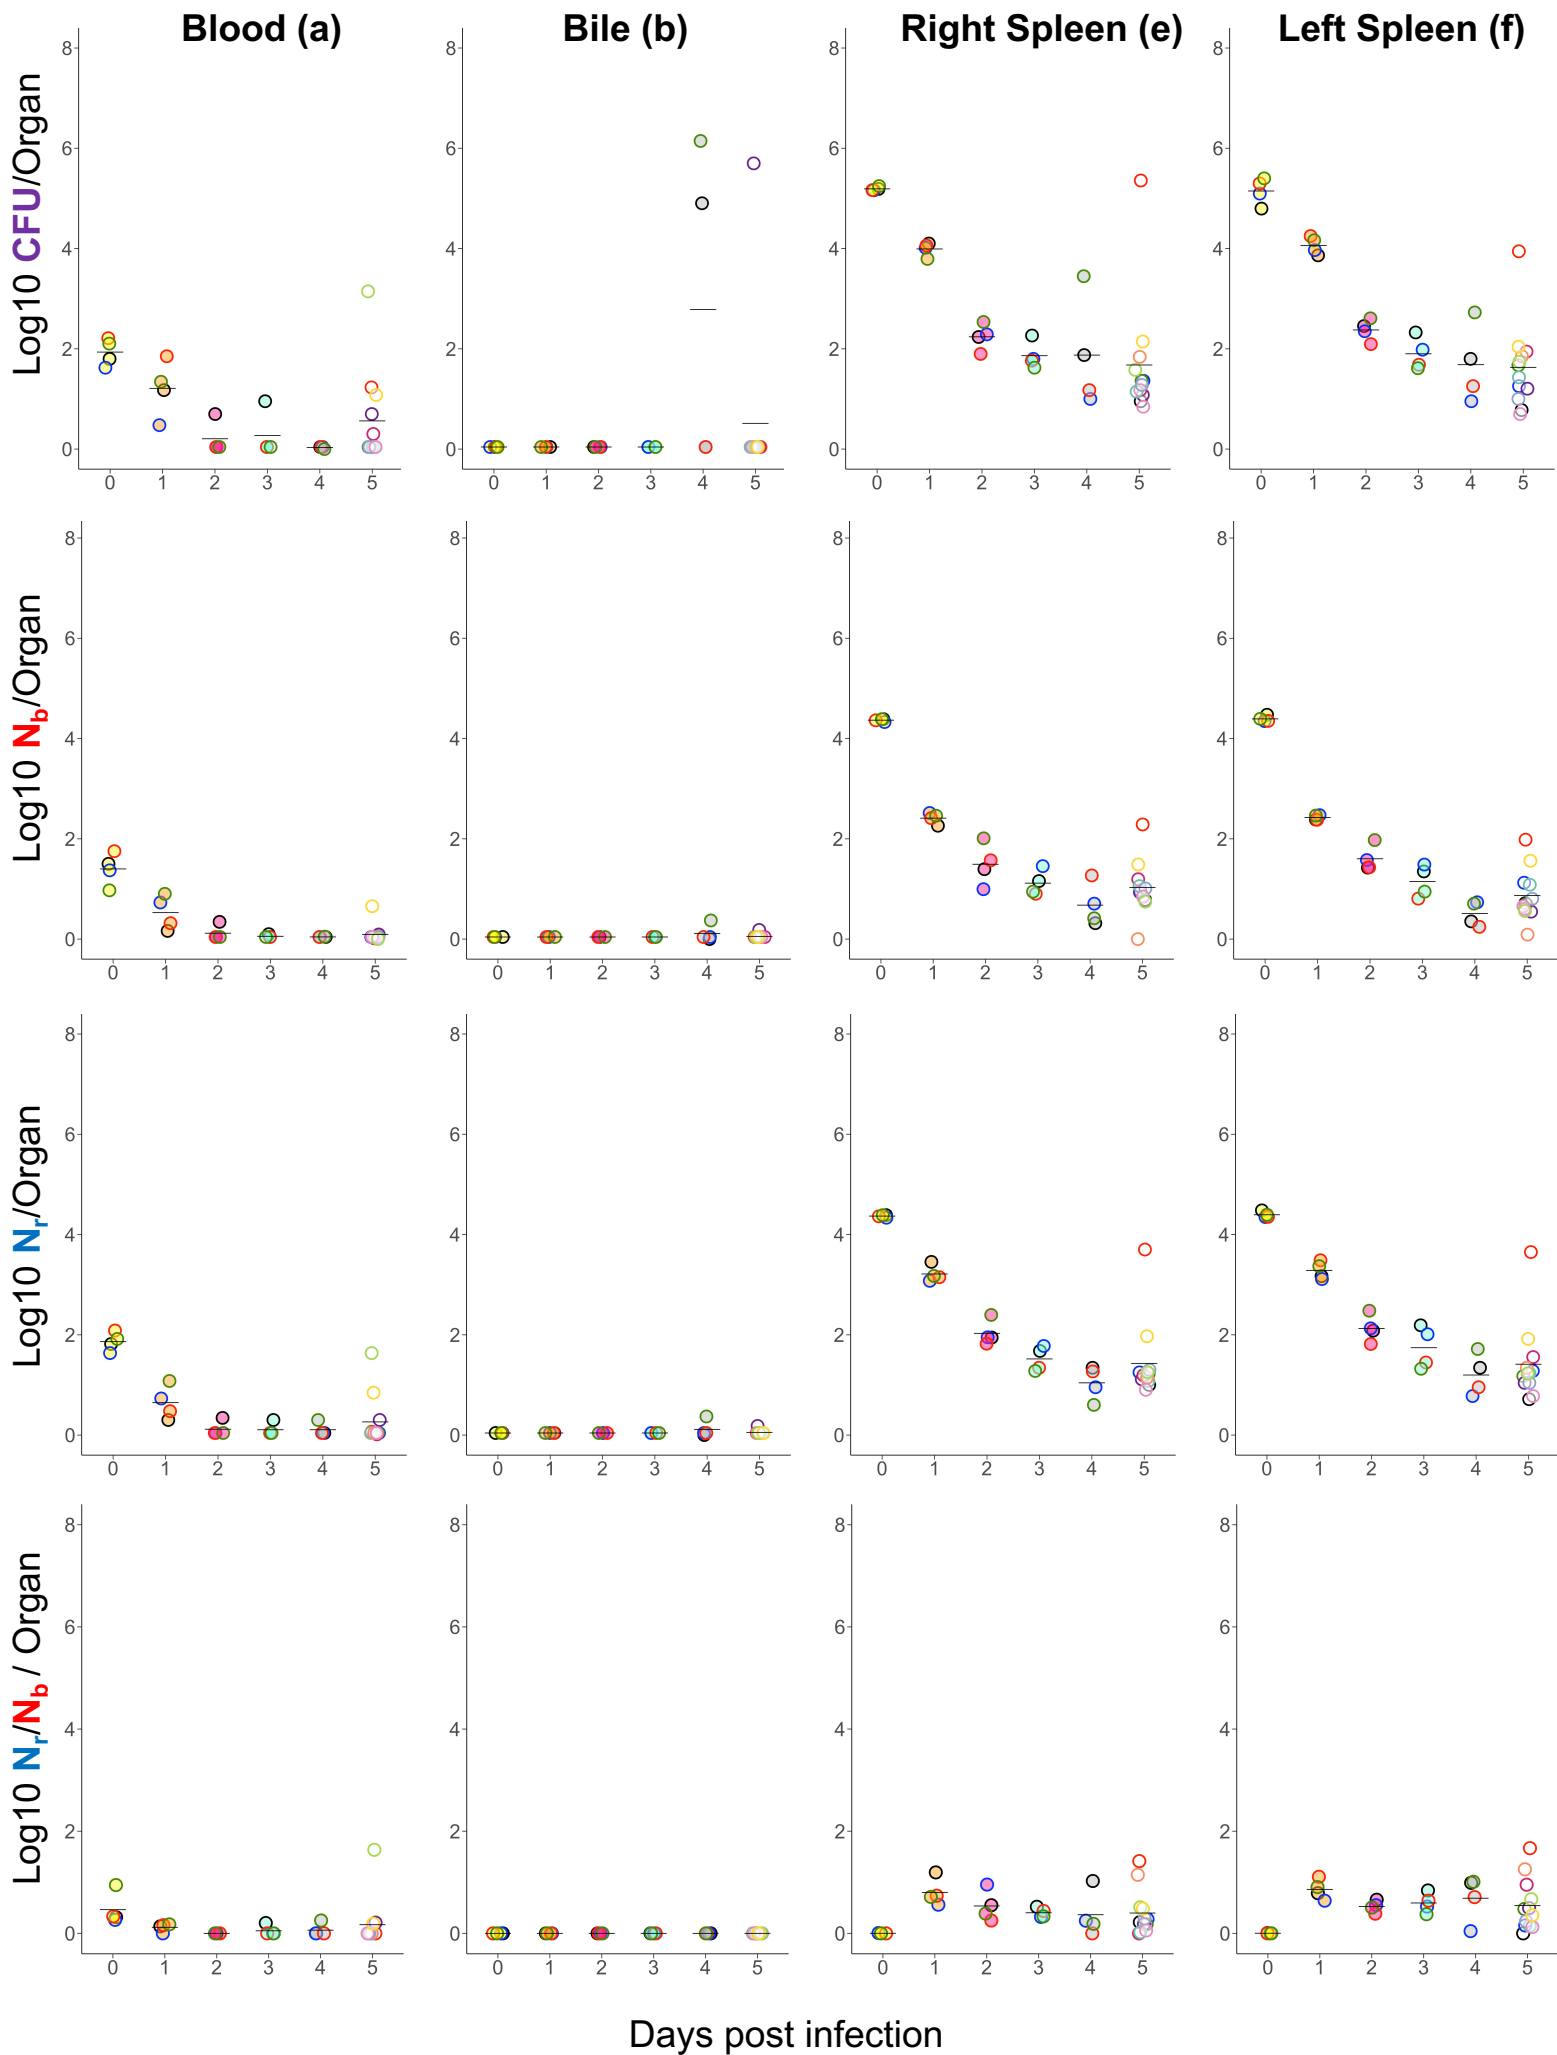

Supplement: supp [file elife-70910-supp-v1.zip]

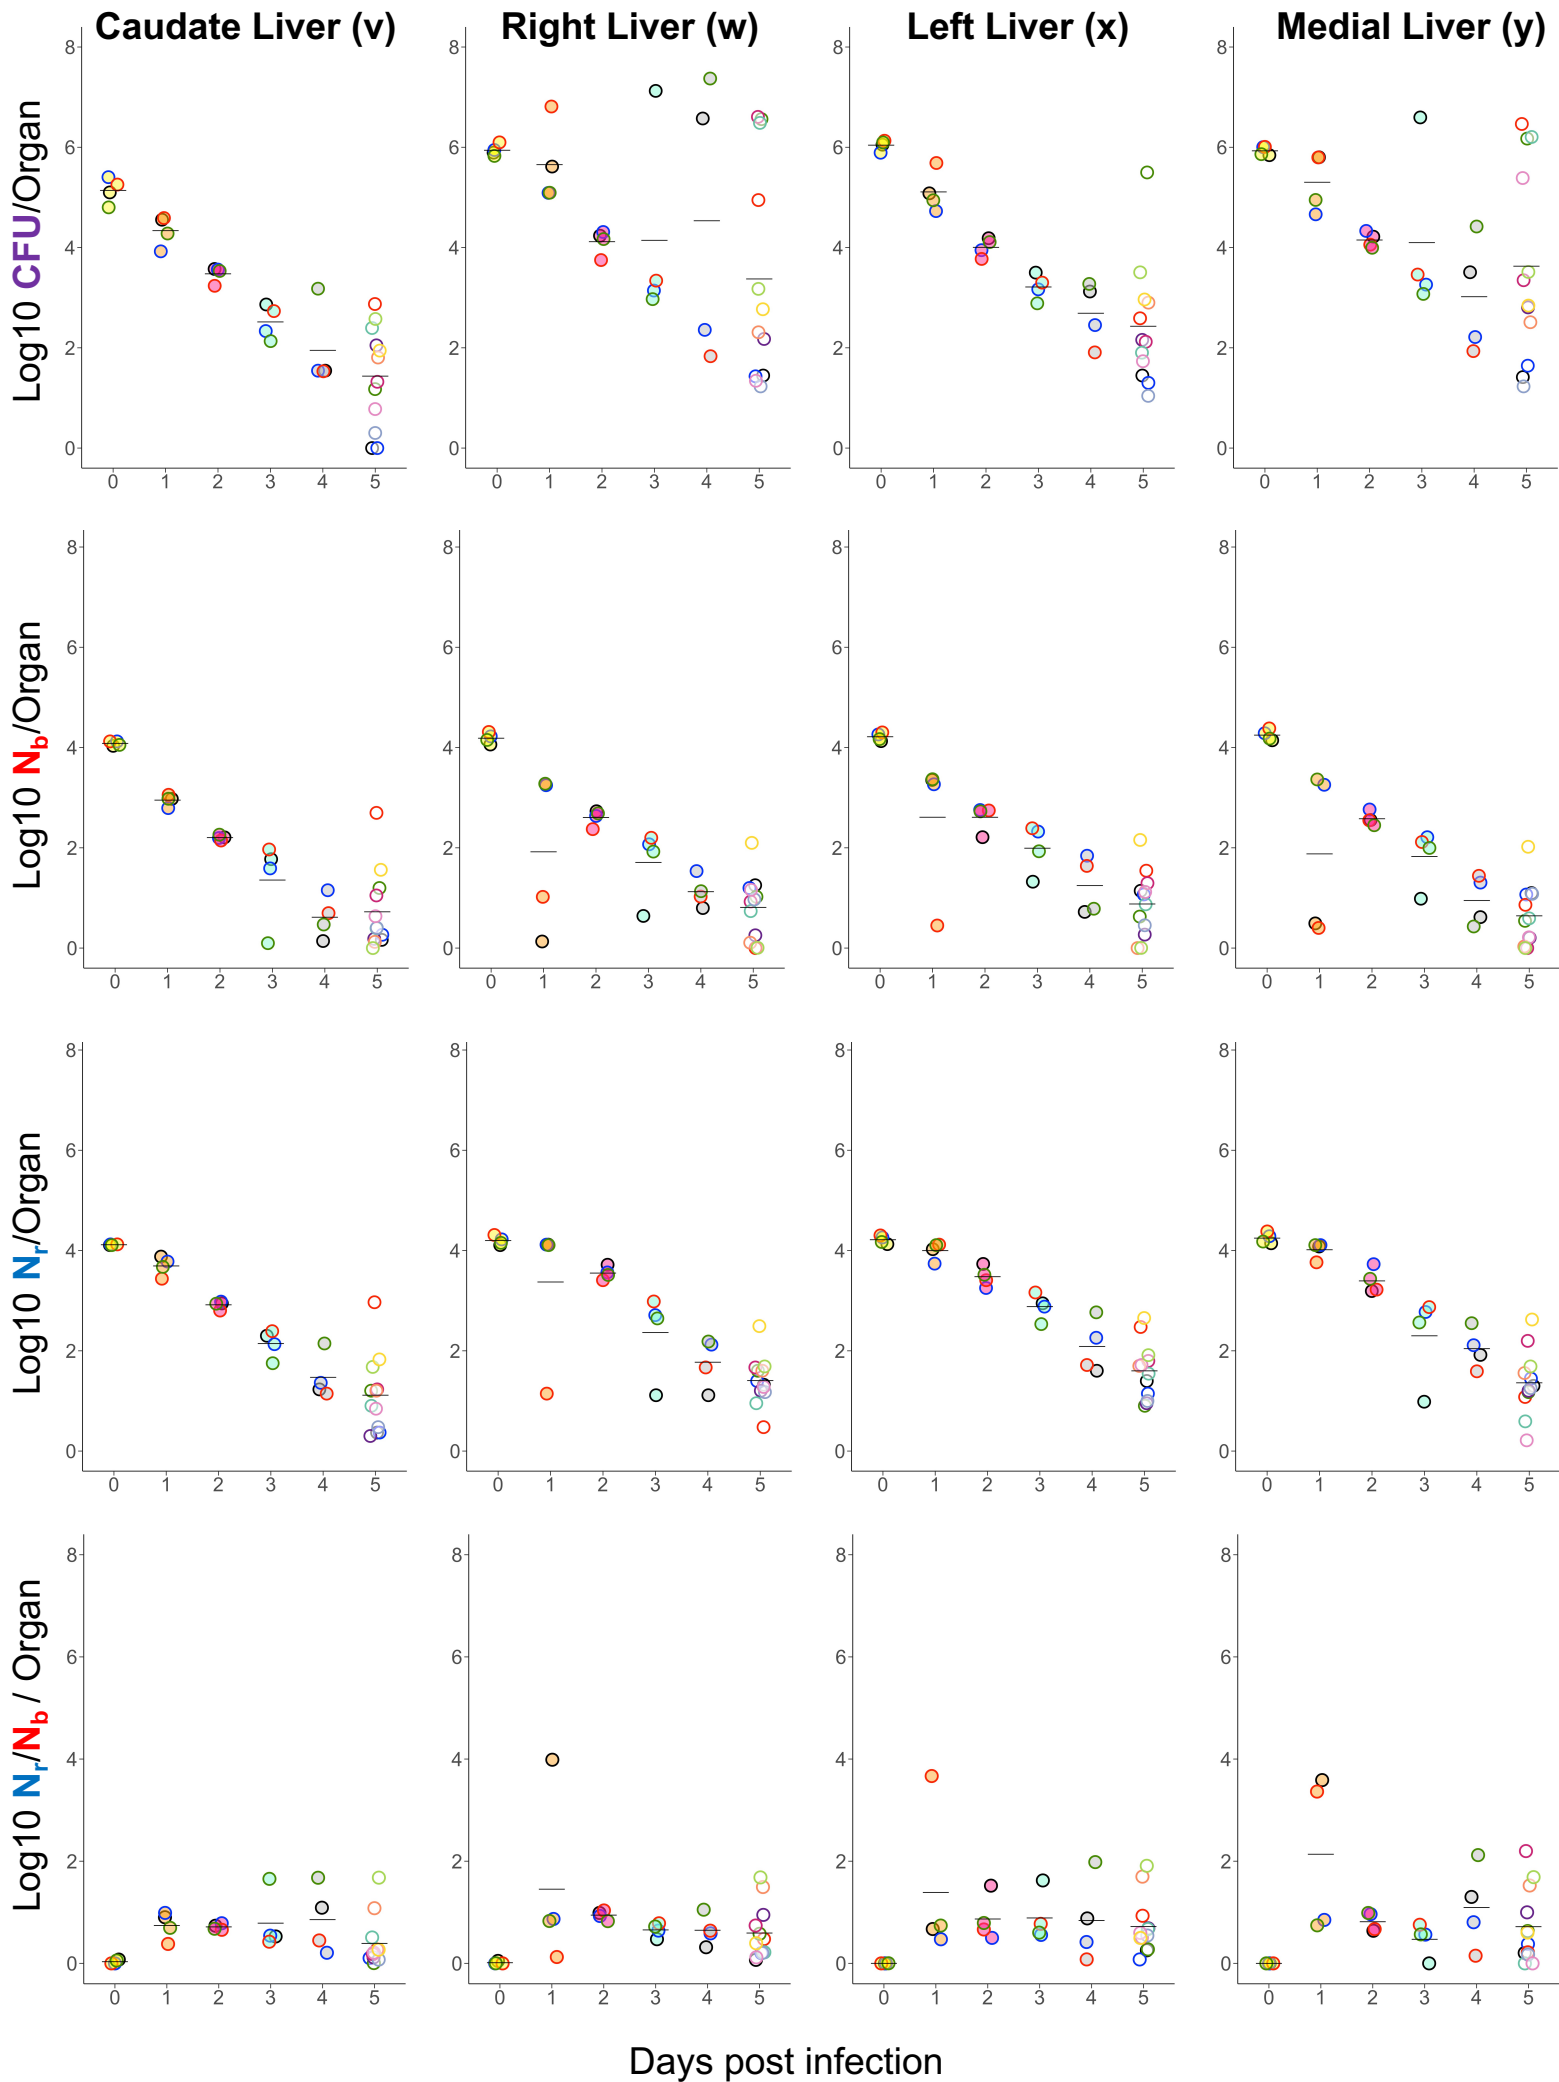

Supplement: supp [file elife-70910-supp-v1.zip]
